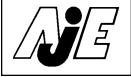

## Original Contribution

# The Effect of Regular Exercise on Quality of Life Among Breast Cancer Survivors

Xiaoli Chen, Ying Zheng, Wei Zheng, Kai Gu, Zhi Chen, Wei Lu, and Xiao Ou Shu

Initially submitted February 17, 2009; accepted for publication June 17, 2009.

The authors evaluated the effect of regular exercise during the first 36 months after cancer diagnosis on quality of life (QOL) in a population-based cohort study of 1,829 Chinese women diagnosed with breast cancer. The women were identified between 2002 and 2004 and were invited to participate in the study about 6 months after cancer diagnosis. Exercise was assessed approximately 6, 18, and 36 months after diagnosis, and a metabolic equivalent task (MET) score in hours per week was derived. A cumulative, weighted exercise-MET score was created for regular exercise during the 36-month postdiagnosis period. QOL was evaluated at 6 and 36 months postdiagnosis. Multiple linear regression and mixed models were conducted to evaluate the association between regular exercise and QOL, with adjustment for clinical prognostic factors and other potential confounders. Both exercise-MET scores measured during the first 6 or 36 months postdiagnosis and the weighted exercise-MET score over the 36-month postdiagnosis period were positively associated with total QOL score and physical, psychological, and social well-being scores assessed at 36 months postdiagnosis (all  $P$  for trend  $< 0.05$ ). Compared with nonregular exercisers, women with higher exercise-MET scores ( $\geq 8.3$  MET-hours/week) were more likely to have higher scores for total QOL and specific QOL domains (all  $P < 0.05$ ). The exercise-QOL association remained stable over time after cancer diagnosis. This study suggests that regular exercise after breast cancer diagnosis improves QOL.

breast neoplasms; cohort studies; exercise; quality of life

Abbreviations: ER, estrogen receptor; FACT-B, Functional Assessment of Cancer Therapy-Breast; MET, metabolic equivalent task; PR, progesterone receptor; QOL, quality of life.

Breast cancer is the most common cancer among women in the world (1). Approximately 4.4 million women worldwide are living with breast cancer (2, 3). In the United States, there are currently more than 2 million breast cancer survivors, and this population is growing (4). Women with breast cancer experience physical and psychological cancer-therapy-related sequelae, which may affect their quality of life (QOL) (5–7). An important goal for breast cancer patients and survivors is to improve their QOL by maximizing functions affected by the disease and cancer-related treatments (8, 9).

There has been considerable interest in whether lifestyle factors, including exercise, enhance QOL for women diagnosed with breast cancer (9–18). A growing number of clinical trials have demonstrated that short-term, structured

exercise interventions may improve QOL for breast cancer patients and survivors (8, 19–27). However, 2 recent clinical trials have reported a null association between supervised exercise and QOL among breast cancer patients (28, 29). A few epidemiologic studies with relatively small sample sizes have examined the association between regular exercise participation and QOL among breast cancer patients or survivors in Western countries via mostly cross-sectional or retrospective study designs (9–14, 17, 18, 30). Evidence from population-based cohort studies with longitudinal assessments of exercise and QOL is lacking. As a result, it is unclear whether unsupervised exercise after cancer diagnosis is related to QOL and, if so, whether this association changes over time. Given that the number of breast cancer patients and survivors has been increasing worldwide,

Correspondence to Dr. Xiao Ou Shu, Vanderbilt Epidemiology Center, 2525 West End Avenue, Suite 600, Nashville, TN 37203-1738 (e-mail: xiao-ou.shu@vanderbilt.edu).

understanding whether and how exercise after cancer diagnosis affects QOL would have significant public health implications.

In this paper, we examine the effect of postdiagnosis exercise on QOL during the first 36 months after breast cancer diagnosis in a large, population-based cohort study in Shanghai, China. With detailed information on patients' sociodemographic and medical characteristics and exercise habits repeatedly collected via in-person interviews over time, our study design enabled a comprehensive evaluation of the association between regular exercise and QOL, both prospectively and at different time points.

## MATERIALS AND METHODS

### Study population

Participants came from the Shanghai Breast Cancer Survival Study, a large, population-based, prospective cohort study of breast cancer survivors conducted in Shanghai, China. Details on the study methods have been reported elsewhere (31, 32). Through the population-based Shanghai Cancer Registry, 2,600 women aged 20–75 years with incident breast cancer were identified between April 1, 2002, and March 31, 2004, and were invited to participate in the study approximately 6 months (range: 3–11) after cancer diagnosis (baseline survey). In-person interviews were completed for 2,230 cases (85.8%); 18 cases died before completing an in-person interview. With the use of structured questionnaires, study participants were followed through in-person interviews administered approximately 18 months (range: 12–25) and 36 months (range: 33–44) after cancer diagnosis. Of the 2,230 cases who completed the baseline interview, 61 (2.7%) died before the 18-month postdiagnosis interview, and 90 (4.0%) died after the 18-month but before the 36-month postdiagnosis interview. After women who refused to participate and those who could not be contacted were excluded, 1,829 women completed the 18-month postdiagnosis interview (82.0%) and 1,845 (82.7%) completed the 36-month postdiagnosis interview as of November 2008. In total, 1,829 cases completed all 3 interviews; these participants constitute the basis of the current study.

This study was approved by the institutional review boards of all institutions involved in the Shanghai Breast Cancer Survival Study. Written informed consent was obtained from all participants before interviews were conducted.

### Data collection

Through in-person interviews, we collected information on cancer diagnosis, cancer-related treatments, relapse/metastasis, disease status, comorbidity, demographics, menstrual and reproductive history, family history of breast cancer, complementary and alternative medicine use, regular exercise participation, usual dietary intake, tea consumption habits, alcohol consumption habits, cigarette smoking habits, and QOL. Anthropometric measurements, including height, weight, waist circumference, and hip circumference, were taken by trained interviewers, all of whom were retired medical professionals. All measurements were taken twice

according to a standard protocol, and the averages of these measurements were used in this study. Body mass index and waist-to-hip ratio were calculated on the basis of these measurements.

Disease- and treatment-related information was collected, including stage of tumor-node metastasis at the time of primary diagnosis, estrogen receptor (ER) and progesterone receptor (PR) status, type of surgery, chemotherapy, radiotherapy, immunotherapy, and tamoxifen use. Additionally, medical charts were reviewed to verify diagnosis, treatment, and disease-stage information. ER and PR status was included in the analyses in the following joint categories: ER+/PR+ (receptor positive), ER-/PR- (receptor negative), and ER-/PR+ or ER+/PR- (receptor mixed). The Charlson comorbidity index was created based on a validated comorbidity scoring system (33), and the diagnostic codes were obtained from the *International Classification of Diseases*, Ninth Revision, Clinical Modification (34).

### Exercise assessment

At each interview, participants were asked whether they participated in recreational exercise regularly (at least twice a week) (yes/no). If the participant answered yes, she was then asked to report as many as 5 of the most common activities she participated in regularly. At baseline, participants reported regular exercise activities that took place during the 6 months preceding the interview. At subsequent interviews, participants reported activities since the last interview (i.e., for the preceding 12 months and 18 months). No women reported participating in more than 4 types of regular exercise during the first 18 months after cancer diagnosis, and only 0.1% of study participants engaged in 5 types of regular exercise according to the 36-month postdiagnosis interview. Information on frequency and duration was obtained for all reported activities.

Each activity was assigned a metabolic equivalent task (MET) score based on the method proposed by Ainsworth et al. (35). A MET score in hours per week (MET-hours/week) for each activity was derived by multiplying the number of hours per week the participant reported engaging in that activity by the MET score assigned to the activity. The values from individual activities were summed to derive a total exercise-MET score. A cumulative, weighted MET score for regular exercise over the 36-month postdiagnosis period was created by using the total exercise-related MET score derived from each interview weighted by the duration of regular exercise. The validity of the exercise assessment in this study was evaluated previously and was proven to be excellent (36).

### QOL assessment

The General Quality of Life Inventory-74 was used to assess QOL at the baseline and 36-month postdiagnosis interviews. The inventory was based on the World Health Organization's Quality of Life Assessment Instrument and was modified for use in the Chinese population. Details about the General Quality of Life Inventory-74 assessment have been described in our previous studies (31, 32).

The inventory comprises 74 items that can be grouped into 20 facets and covers the following 4 domains: 1) physical well-being, 2) psychological well-being, 3) social well-being, and 4) material well-being. In this study, we focused on the first 3 domains (physical, psychological, and social well-being). Participants' responses were converted to scores on a 0–100 scale for each domain and each facet, with higher scores reflecting better QOL. A total QOL score was also calculated. The QOL assessment questionnaire has been demonstrated to have a satisfactory level of reliability and validity (37, 38) and has been used in epidemiologic surveys of breast cancer patients and survivors (31, 32).

### Statistical analysis

Differences in sociodemographic and medical characteristics by regular exercise participation at baseline and follow-up interviews were evaluated by using Student's *t* test and/or the  $\chi^2$  test. Pearson correlation coefficients between total QOL score and domain-specific scores assessed 6 and 36 months after cancer diagnosis were calculated. The primary outcomes of this analysis were total QOL; physical, psychological, and social well-being domains; and selected facets of QOL (e.g., psychological distress). Mean differences and 95% confidence intervals for QOL scores across exercise levels were calculated by using multiple linear regression analyses with adjustment for potential confounders, including age at diagnosis, marital status, income, education, comorbidity, menopausal status, menopausal symptoms, body mass index, waist-to-hip ratio, tea consumption, chemotherapy, disease stage, ER/PR status, and recurrence/metastasis. Other factors such as time interval from diagnosis to study enrollment and cigarette smoking were not significantly related to QOL in univariate analyses and were not included in our multivariate models.

We categorized women who reported regular exercise participation into low- and high-exercise-level groups using an established exercise guideline (39) cutpoint of 500 MET/minutes per week or 8.3 MET-hours/week (low-level group: <8.3 MET-hours/week; high-level group:  $\geq$ 8.3 MET-hours/week). Those who reported no regular exercise participation served as the reference group in the analyses. Analyses stratified by baseline QOL, ER/PR status, tumor-node metastasis stage, and comorbidity were performed, and interaction terms were added in the corresponding models to evaluate their potential interactive effects with regular exercise on QOL.

We also applied mixed models to examine whether the exercise-QOL association changed over time. Because QOL was measured only twice (at the 6- and 36-month postdiagnosis interviews) and regular exercise was assessed at 3 time points (at the 6-, 18-, and 36-month postdiagnosis interviews) in our study, the data were analyzed in 2 ways. The first approach was to use the exercise data collected at only the 6- and 36-month postdiagnosis interviews. The second approach was to average the exercise-related MET score based on information collected at the 18- and 36-month postdiagnosis interviews (weighted by the time intervals). The time was set to 0 for the baseline interview (6 months postdiagnosis) and to 1 for the 36-month post-

diagnosis interview. Interaction terms for exercise with time were examined by using the mixed models to evaluate whether the exercise-QOL association changed over time. We also analyzed the 3 exercise measurements with an imputed 18-month postdiagnosis QOL score based on QOL assessed at the 6- and 36-month postdiagnosis interviews. These analyses produced similar findings; results from the first approach are presented in this paper.

Tests for trend in the analyses were performed by entering the categorical variables as continuous parameters in the corresponding models. All tests were performed by using Statistical Analysis Software (SAS, version 9.1; SAS Institute, Inc., Cary, North Carolina). The significance levels were set at  $P < 0.05$  for 2-sided analyses.

### RESULTS

The median follow-up period after breast cancer diagnosis was 36.2 months (range: 32.7–44.4). There were no significant differences in sociodemographic or medical characteristics between all participants enrolled ( $n = 2,230$ ) and those included in the current study ( $n = 1,829$ ). Approximately 69%, 75%, and 74% of women reported exercising regularly 6, 18, and 36 months after diagnosis, respectively. Baseline QOL scores for total QOL and the physical, psychological, and social well-being domains were significantly associated with scores 36 months after diagnosis. The corresponding correlation coefficients were 0.61 for total QOL, 0.52 for physical well-being, 0.49 for psychological well-being, and 0.55 for social well-being (all  $P < 0.001$ ).

Table 1 summarizes participant characteristics by regular exercise participation status at each follow-up survey. The mean age at diagnosis was 53.7 years (standard deviation, 10.2). At baseline, women who reported regularly exercising, compared with nonregular exercisers, were a significantly younger age at menarche, had a lower waist-to-hip ratio, had a higher income, had less comorbidity, consumed more tea, and had a higher QOL. At the 18-month postdiagnosis survey, regular exercisers were more likely than nonregular exercisers to be younger at cancer diagnosis, have higher educational attainment, have a higher income, and have a higher QOL, and they were more likely to be postmenopausal. No significant differences were found regarding other characteristics. Similar results were observed when comparisons were made based on regular exercise participation at the 36-month postdiagnosis interview.

Multiple linear regression models with adjustment for lifestyle, clinical, and sociodemographic variables indicated that baseline exercise was significantly and positively associated with concurrent physical, psychological, and social well-being, as well as with total QOL (trend test: all  $P < 0.05$ ; data not shown in tables). The baseline exercise-related MET score and the weighted exercise-related MET score over the 36-month postdiagnosis period were both significantly and positively related to QOL 36 months after diagnosis (trend test: all  $P < 0.05$ ; Table 2). Further adjustment for baseline QOL attenuated the association of the baseline exercise-related MET score with QOL at the follow-up survey. However, the weighted 36-month exercise-related MET score was still significantly and positively

**Table 1.** Baseline Characteristics<sup>a</sup> of Study Participants by Regular Exercise Participation Status<sup>b</sup> 6, 18, and 36 Months After Cancer Diagnosis, Shanghai Breast Cancer Survival Study, China, 2002–2008

| Characteristic                     | Total<br>(N = 1,829) | Regular Exercise Participation<br>After Diagnosis |                    |                         |                 |                    |                         |                 |                    |                         |
|------------------------------------|----------------------|---------------------------------------------------|--------------------|-------------------------|-----------------|--------------------|-------------------------|-----------------|--------------------|-------------------------|
|                                    |                      | 6 Months                                          |                    |                         | 18 Months       |                    |                         | 36 Months       |                    |                         |
|                                    |                      | No<br>(n = 566)                                   | Yes<br>(n = 1,263) | P<br>Value <sup>c</sup> | No<br>(n = 454) | Yes<br>(n = 1,375) | P<br>Value <sup>c</sup> | No<br>(n = 475) | Yes<br>(n = 1,354) | P<br>Value <sup>c</sup> |
| Age at diagnosis, years            | 53.7 (10.2)          | 54.0 (10.4)                                       | 53.5 (10.2)        | 0.320                   | 52.1 (10.8)     | 54.2 (10.0)        | <0.001                  | 52.7 (10.7)     | 54.0 (10.1)        | 0.023                   |
| Age at menarche, years             | 14.4 (1.6)           | 14.5 (1.7)                                        | 14.3 (1.6)         | 0.024                   | 14.4 (1.6)      | 14.4 (1.6)         | 0.800                   | 14.4 (1.6)      | 14.4 (1.6)         | 0.749                   |
| Married                            | 87.2                 | 86.0                                              | 87.7               | 0.343                   | 85.2            | 87.8               | 0.161                   | 84.6            | 88.0               | 0.057                   |
| Body mass index, kg/m <sup>2</sup> | 24.2 (3.4)           | 24.3 (3.5)                                        | 24.2 (3.3)         | 0.482                   | 24.2 (3.6)      | 24.2 (3.3)         | 0.703                   | 24.2 (3.5)      | 24.2 (3.3)         | 0.973                   |
| Waist-to-hip ratio                 | 0.83 (0.05)          | 0.84 (0.05)                                       | 0.83 (0.05)        | 0.001                   | 0.83 (0.06)     | 0.83 (0.05)        | 0.643                   | 0.83 (0.06)     | 0.83 (0.05)        | 0.817                   |
| Educational level                  |                      |                                                   |                    |                         |                 |                    |                         |                 |                    |                         |
| <High school                       | 50.0                 | 53.0                                              | 48.7               | 0.061                   | 47.4            | 50.9               | <0.001                  | 50.5            | 49.9               | 0.005                   |
| High school                        | 35.4                 | 35.2                                              | 35.6               |                         | 42.5            | 33.1               |                         | 39.2            | 34.1               |                         |
| >High school                       | 14.5                 | 11.8                                              | 15.8               |                         | 10.1            | 16.0               |                         | 10.3            | 16.0               |                         |
| Income (yuan/month<br>per capita)  |                      |                                                   |                    |                         |                 |                    |                         |                 |                    |                         |
| <1,000                             | 66.3                 | 70.1                                              | 64.6               | 0.019                   | 72.0            | 64.4               | 0.010                   | 72.6            | 64.1               | 0.003                   |
| 1,000–1,999                        | 24.9                 | 23.5                                              | 25.5               |                         | 21.4            | 26.0               |                         | 20.6            | 26.4               |                         |
| ≥2,000                             | 8.8                  | 6.4                                               | 9.9                |                         | 6.6             | 9.5                |                         | 6.7             | 9.5                |                         |
| Postmenopause <sup>d</sup>         | 78.4                 | 78.8                                              | 78.2               | 0.755                   | 69.4            | 81.3               | <0.001                  | 72.8            | 80.3               | <0.001                  |
| Menopausal symptoms <sup>d</sup>   | 76.8                 | 78.5                                              | 76.1               | 0.270                   | 76.2            | 77.0               | 0.724                   | 76.4            | 77.0               | 0.812                   |
| Comorbidity score ≥1 <sup>d</sup>  | 18.9                 | 21.7                                              | 17.6               | 0.036                   | 21.6            | 18.0               | 0.087                   | 18.1            | 19.1               | 0.624                   |
| Alcohol consumption                | 2.4                  | 2.5                                               | 2.4                | 0.899                   | 2.4             | 2.4                | 0.978                   | 2.5             | 2.4                | 0.842                   |
| Tea consumption                    | 22.7                 | 18.6                                              | 24.5               | 0.005                   | 22.5            | 22.8               | 0.896                   | 24.4            | 22.1               | 0.295                   |
| Cigarette smoking                  | 2.2                  | 2.8                                               | 1.9                | 0.210                   | 3.3             | 1.8                | 0.061                   | 3.4             | 1.8                | 0.041                   |
| Recurrence/metastasis <sup>d</sup> |                      |                                                   |                    |                         |                 |                    |                         |                 |                    |                         |
| Yes                                | 3.7                  | 4.1                                               | 3.5                | 0.502 <sup>e</sup>      | 4.2             | 3.5                | 0.479 <sup>e</sup>      | 5.2             | 3.3                | 0.055 <sup>e</sup>      |
| No                                 | 93.0                 | 91.5                                              | 93.6               |                         | 91.6            | 93.4               |                         | 90.7            | 93.7               |                         |
| Unknown                            | 3.4                  | 4.4                                               | 2.9                |                         | 4.2             | 3.1                |                         | 4.2             | 3.1                |                         |
| Mastectomy                         | 95.1                 | 94.7                                              | 95.3               | 0.615                   | 94.5            | 95.3               | 0.506                   | 94.7            | 95.2               | 0.688                   |
| Chemotherapy                       | 91.9                 | 93.1                                              | 91.3               | 0.189                   | 90.8            | 92.2               | 0.321                   | 91.8            | 91.9               | 0.953                   |
| Radiotherapy                       | 28.4                 | 33.2                                              | 26.3               | 0.002                   | 28.9            | 28.3               | 0.817                   | 28.8            | 28.3               | 0.817                   |
| Immunotherapy                      | 13.3                 | 14.0                                              | 13.1               | 0.593                   | 13.7            | 13.2               | 0.819                   | 12.6            | 13.6               | 0.583                   |
| Tamoxifen use                      | 58.9                 | 55.7                                              | 60.3               | 0.060                   | 60.8            | 58.3               | 0.341                   | 59.0            | 58.9               | 0.974                   |
| ER/PR status                       |                      |                                                   |                    |                         |                 |                    |                         |                 |                    |                         |
| ER+/PR+                            | 52.2                 | 55.1                                              | 50.8               | 0.216 <sup>e</sup>      | 55.1            | 51.2               | 0.403 <sup>e</sup>      | 53.3            | 51.8               | 0.838 <sup>e</sup>      |
| ER-/PR-                            | 26.2                 | 24.2                                              | 27.1               |                         | 25.8            | 26.3               |                         | 26.5            | 26.1               |                         |
| ER+/PR-, ER-/PR+                   | 20.0                 | 18.9                                              | 20.4               |                         | 18.3            | 20.5               |                         | 19.2            | 20.2               |                         |
| Unknown                            | 1.7                  | 1.8                                               | 1.7                |                         | 0.9             | 2.0                |                         | 1.1             | 1.9                |                         |
| TNM stage                          |                      |                                                   |                    |                         |                 |                    |                         |                 |                    |                         |
| 0–I                                | 36.4                 | 34.1                                              | 37.4               | 0.196 <sup>e</sup>      | 35.0            | 36.8               | 0.671 <sup>e</sup>      | 36.6            | 36.3               | 0.793 <sup>e</sup>      |
| IIA                                | 34.1                 | 32.9                                              | 34.6               |                         | 35.5            | 33.6               |                         | 34.5            | 33.9               |                         |
| IIB                                | 18.8                 | 21.0                                              | 17.7               |                         | 19.4            | 18.6               |                         | 18.5            | 18.8               |                         |
| III–IV                             | 6.9                  | 7.8                                               | 6.5                |                         | 6.0             | 7.2                |                         | 8.0             | 6.5                |                         |
| Unknown                            | 3.9                  | 4.2                                               | 3.8                |                         | 4.2             | 3.9                |                         | 2.3             | 4.5                |                         |
| Total QOL score                    | 59.3 (7.9)           | 57.5 (8.3)                                        | 60.1 (7.6)         | 0.001                   | 58.5 (8.4)      | 59.6 (7.8)         | 0.020                   | 58.1 (8.3)      | 59.8 (7.8)         | <0.001                  |

Abbreviations: ER, estrogen receptor; PR, progesterone receptor; TNM, tumor-node metastasis; QOL, quality of life.

<sup>a</sup> Values are presented as mean (standard deviation) or percentage.

<sup>b</sup> Women were asked whether they regularly (at least twice a week) participated in exercise and were categorized as regular exercisers if they answered yes and as nonregular exercisers if they answered no.

<sup>c</sup> For tests of differences between women with and without regular exercise participation.

<sup>d</sup> Information 36 months after cancer diagnosis.

<sup>e</sup> For the  $\chi^2$  test, the “unknown” group was excluded.

**Table 2.** Linear Regression Models<sup>a</sup>: Adjusted Mean Differences in Total QOL Score and Scores in 3 QOL Domains Across Exercise Levels, Shanghai Breast Cancer Survival Study, China, 2002–2008

| QOL 36 Months After Diagnosis                       | Exercise-related MET Score 6 Months After Diagnosis <sup>b</sup> |             |                 |             |             | Weighted Exercise-related MET Score During the 36 Months After Diagnosis <sup>b</sup> |             |                  |             |             |
|-----------------------------------------------------|------------------------------------------------------------------|-------------|-----------------|-------------|-------------|---------------------------------------------------------------------------------------|-------------|------------------|-------------|-------------|
|                                                     | <8.3 (n = 568)                                                   |             | ≥8.3 (n = 695)  |             | P for Trend | <8.3 (n = 565)                                                                        |             | ≥8.3 (n = 1,100) |             | P for Trend |
|                                                     | Mean Difference                                                  | 95% CI      | Mean Difference | 95% CI      |             | Mean Difference                                                                       | 95% CI      | Mean Difference  | 95% CI      |             |
| Total QOL score                                     | 1.56                                                             | 0.65, 2.46  | 1.70            | 0.83, 2.57  | <0.001      | 1.17                                                                                  | -0.19, 2.53 | 2.29             | 1.01, 3.57  | <0.001      |
| Physical well-being                                 | 1.19                                                             | 0.06, 2.33  | 1.83            | 0.74, 2.92  | 0.001       | 0.54                                                                                  | -1.16, 2.24 | 1.43             | -0.18, 3.04 | 0.025       |
| Psychosocial well-being                             | 1.63                                                             | 0.45, 2.80  | 1.62            | 0.49, 2.75  | 0.007       | 0.91                                                                                  | -0.86, 2.67 | 2.13             | 0.46, 3.80  | 0.002       |
| Social well-being                                   | 1.37                                                             | 0.27, 2.47  | 2.09            | 1.03, 3.16  | <0.001      | 1.34                                                                                  | -0.31, 2.99 | 3.18             | 1.63, 4.74  | <0.001      |
| Further adjustment for QOL 6 months after diagnosis |                                                                  |             |                 |             |             |                                                                                       |             |                  |             |             |
| Total QOL score                                     | 0.50                                                             | -0.26, 1.26 | 0.33            | -0.40, 1.06 | 0.404       | 0.49                                                                                  | -0.64, 1.62 | 1.15             | 0.08, 2.22  | 0.009       |
| Physical well-being                                 | 0.22                                                             | -0.78, 1.23 | 0.61            | -0.36, 1.58 | 0.213       | 0.23                                                                                  | -1.27, 1.74 | 1.05             | -0.37, 2.47 | 0.041       |
| Psychosocial well-being                             | 0.80                                                             | -0.25, 1.86 | 0.52            | -0.50, 1.53 | 0.354       | 0.41                                                                                  | -1.17, 1.99 | 1.20             | -0.30, 2.69 | 0.039       |
| Social well-being                                   | 0.69                                                             | -0.28, 1.65 | 0.74            | -0.19, 1.66 | 0.131       | 0.86                                                                                  | -0.58, 2.30 | 1.87             | 0.50, 3.23  | 0.001       |

Abbreviations: CI, confidence interval; MET, metabolic equivalent task; QOL, quality of life.

<sup>a</sup> Models were adjusted for age at diagnosis, marital status, income, education, comorbidity, menopausal status, menopausal symptoms, waist-to-hip ratio, body mass index, tea consumption, chemotherapy, estrogen receptor/progesterone receptor status, tumor-node metastasis stage, and recurrence/metastasis. Participants in the nonregular exercise group served as the reference.

<sup>b</sup> The cutpoint (8.3 MET-hours/week) was based on the US Department of Health and Human Services national recommendation for recreational physical activity (39).

associated with the total QOL score and with scores for physical well-being, psychological well-being, and social well-being at follow-up (trend test: all  $P < 0.05$ ).

Table 3 presents the associations between regular exercise and selected QOL facets. Compared with nonregular exercisers, women with higher exercise levels at baseline ( $\geq 8.3$  MET-hours/week) reported higher capacity for daily living, less psychological distress, more positive feelings, better body image, higher work and study capacity, more recreational activity, better marriage and family relationships, and higher general QOL at the 36-month follow-up (trend test: all  $P < 0.05$ ). Similar results were observed for analyses of the weighted exercise-related MET score. Although further adjustment for baseline QOL attenuated the associations, positive linear trends for associations of the weighted exercise-related MET score with QOL 36 months after diagnosis were observed for most facets, such as psychological distress ( $P < 0.01$ ) and positive feelings ( $P < 0.05$ ).

We also evaluated whether baseline QOL modified the association between regular exercise and QOL at the 36-month follow-up (Table 4). Positive associations with baseline or weighted exercise-related MET scores were observed among women with low and high QOL at baseline (interaction term test: all  $P > 0.05$ ). Similarly, we did not find any interaction of comorbidity, tumor-node metastasis stage, or ER/PR status with regular exercise that affected QOL among breast cancer survivors (data not shown).

Table 5 presents results of analyses using mixed models for regular exercise and QOL assessed 6 and 36 months after cancer diagnosis. Compared with nonregular exercisers, women who had a low level of regular exercise ( $< 8.3$  MET-hours/week) were more likely to have higher total

QOL scores and higher scores for the physical, psychological, and social well-being domains (all  $P < 0.01$ ). However, women who met recommended exercise levels ( $\geq 8.3$  MET-hours/week) showed much more improvement in both their total QOL score and scores for each of the 3 domains (all  $P < 0.001$ ). For analyses over time, the total QOL score and scores for the 3 QOL domains increased significantly over the 36-month postdiagnosis period (test for time: all  $P < 0.05$ ). The positive association between regular exercise and QOL remained stable over time after cancer diagnosis (interaction term test for time: all  $P > 0.05$ ; data not shown). Similar results were found for most selected QOL facets (data not shown).

## DISCUSSION

In this population-based cohort study, we found that regular-exercise level after breast cancer diagnosis was significantly and positively related to QOL assessed 6 and 36 months after diagnosis among breast cancer survivors, even after controlling for baseline QOL. Women who met exercise recommendations ( $\geq 8.3$  MET-hours/week) had higher total QOL scores and higher scores for physical, psychological, and social well-being domains after cancer diagnosis, and this association remained stable over time. The exercise-QOL association varied little by baseline QOL, disease stage, ER/PR status, or the existence of comorbidity. To our knowledge, this is one of the largest and most comprehensive population-based cohort studies to prospectively evaluate the association of regular exercise with QOL among breast cancer survivors.

**Table 3.** Linear Regression Models<sup>a</sup>: Adjusted Mean Differences in Selected QOL Facets Across Exercise Levels, Shanghai Breast Cancer Survival Study, China, 2002–2008

| QOL 36 Months After Diagnosis                       | Exercise-related MET Score 6 Months After Diagnosis <sup>b</sup> |             |                 |             |             | Weighted Exercise-related MET Score During the 36 Months After Diagnosis <sup>b</sup> |             |                  |             |             |
|-----------------------------------------------------|------------------------------------------------------------------|-------------|-----------------|-------------|-------------|---------------------------------------------------------------------------------------|-------------|------------------|-------------|-------------|
|                                                     | <8.3 (n = 568)                                                   |             | ≥8.3 (n = 695)  |             | P for Trend | <8.3 (n = 565)                                                                        |             | ≥8.3 (n = 1,100) |             | P for Trend |
|                                                     | Mean Difference                                                  | 95% CI      | Mean Difference | 95% CI      |             | Mean Difference                                                                       | 95% CI      | Mean Difference  | 95% CI      |             |
| Sleep and energy                                    | 1.77                                                             | -0.10, 3.64 | 1.28            | -0.51, 3.08 | 0.186       | 1.00                                                                                  | -1.81, 3.80 | 2.24             | -0.41, 4.89 | 0.043       |
| Physical discomfort                                 | 1.56                                                             | -0.44, 3.56 | 2.24            | -0.32, 4.16 | 0.024       | 2.65                                                                                  | -0.35, 5.65 | 2.10             | -0.73, 4.94 | 0.457       |
| Daily living capability                             | 1.07                                                             | -0.31, 2.46 | 2.23            | 0.90, 3.56  | 0.001       | -0.72                                                                                 | -2.80, 1.36 | 0.97             | -1.00, 2.94 | 0.029       |
| Psychological distress                              | 2.53                                                             | 1.03, 4.03  | 1.78            | 0.34, 3.22  | 0.023       | 1.71                                                                                  | -0.54, 3.96 | 3.36             | 1.24, 5.49  | <0.001      |
| Positive feelings                                   | 3.04                                                             | 0.99, 5.09  | 2.26            | 0.29, 4.23  | 0.034       | 2.88                                                                                  | -0.20, 5.96 | 4.18             | 1.27, 7.09  | 0.005       |
| Body image                                          | 0.80                                                             | -0.60, 2.19 | 1.93            | 0.59, 3.28  | 0.005       | 0.10                                                                                  | -2.00, 2.20 | 1.33             | -0.66, 3.32 | 0.043       |
| Social support                                      | 1.19                                                             | -0.89, 3.27 | 1.26            | -0.74, 3.26 | 0.230       | 1.70                                                                                  | -1.42, 4.83 | 3.18             | 0.23, 6.13  | 0.016       |
| Work and study capacity                             | 1.59                                                             | 0.22, 2.95  | 3.09            | 1.78, 4.40  | <0.001      | 0.55                                                                                  | -1.51, 2.60 | 2.51             | 0.57, 4.45  | <0.001      |
| Recreational activity                               | 2.43                                                             | 1.10, 3.77  | 3.40            | 2.12, 4.68  | <0.001      | 2.68                                                                                  | 0.70, 4.67  | 5.99             | 4.11, 7.87  | <0.001      |
| Marriage and family                                 | 1.37                                                             | -0.23, 2.98 | 2.22            | 0.68, 3.76  | 0.005       | 1.65                                                                                  | -0.76, 4.05 | 3.38             | 1.11, 5.65  | 0.001       |
| General QOL                                         | 1.67                                                             | 0.20, 3.15  | 1.90            | 0.48, 3.32  | 0.010       | 0.95                                                                                  | -1.27, 3.16 | 2.56             | 0.46, 4.65  | 0.002       |
| Further adjustment for QOL 6 months after diagnosis |                                                                  |             |                 |             |             |                                                                                       |             |                  |             |             |
| Sleep and energy                                    | 0.16                                                             | -1.52, 1.84 | -0.61           | -2.23, 1.01 | 0.434       | -0.49                                                                                 | -3.00, 2.03 | 0.73             | -1.66, 3.11 | 0.188       |
| Physical discomfort                                 | 0.94                                                             | -0.95, 2.83 | 1.57            | -0.24, 3.38 | 0.091       | 2.56                                                                                  | -0.26, 5.39 | 2.09             | -0.58, 4.77 | 0.406       |
| Daily living capability                             | 0.39                                                             | -0.88, 1.65 | 1.24            | 0.02, 2.46  | 0.043       | -0.27                                                                                 | -2.16, 1.63 | 1.25             | 0.54, 3.04  | 0.014       |
| Psychological distress                              | 1.82                                                             | 0.38, 3.25  | 1.07            | -0.31, 2.45 | 0.162       | 1.22                                                                                  | -0.93, 3.36 | 2.59             | 0.56, 4.62  | 0.003       |
| Positive feelings                                   | 2.26                                                             | 0.34, 4.18  | 0.92            | -0.93, 2.77 | 0.395       | 2.23                                                                                  | -0.65, 5.10 | 3.07             | 0.35, 5.79  | 0.031       |
| Body image                                          | 0.25                                                             | -1.06, 1.55 | 1.06            | -0.20, 2.32 | 0.094       | -0.43                                                                                 | -2.39, 1.54 | 0.30             | -1.56, 2.16 | 0.366       |
| Social support                                      | 1.42                                                             | -0.49, 3.32 | 1.21            | -0.62, 3.04 | 0.215       | 0.59                                                                                  | -2.27, 3.44 | 2.00             | -0.71, 4.70 | 0.049       |
| Work and study capacity                             | 0.80                                                             | -0.47, 2.09 | 1.76            | 0.52, 2.99  | 0.005       | 0.94                                                                                  | -0.97, 2.86 | 2.14             | 0.34, 3.95  | 0.004       |
| Recreational activity                               | 1.79                                                             | 0.46, 3.12  | 2.30            | 1.01, 3.60  | 0.001       | 2.34                                                                                  | 0.38, 4.30  | 5.15             | 3.28, 7.01  | <0.001      |
| Marriage and family                                 | 0.84                                                             | -0.61, 2.29 | 1.36            | -0.03, 2.76 | 0.058       | 1.38                                                                                  | -0.83, 3.52 | 2.28             | 0.22, 4.34  | 0.017       |
| General QOL                                         | 0.49                                                             | -0.85, 1.83 | 0.53            | -0.76, 1.81 | 0.436       | 0.57                                                                                  | -1.43, 2.57 | 1.62             | -0.27, 3.51 | 0.028       |

Abbreviations: CI, confidence interval; MET, metabolic equivalent task; QOL, quality of life.

<sup>a</sup> Models were adjusted for age at diagnosis, marital status, income, education, comorbidity, menopausal status, menopausal symptoms, waist-to-hip ratio, body mass index, tea consumption, chemotherapy, estrogen receptor/progesterone receptor status, tumor-node metastasis stage, and recurrence/metastasis. Participants in the nonregular exercise group served as the reference.

<sup>b</sup> The cutpoint (8.3 MET-hours/week) was based on the US Department of Health and Human Services national recommendation for recreational physical activity (39).

Clinical trials have shown the importance of a short-term, structured exercise intervention to QOL among breast cancer patients and survivors (8, 19, 21, 23, 24, 40–42), although 2 recent randomized clinical trials reported no significant effect (28, 29). Courneya et al. (8) found that a 15-week exercise training intervention was linked to increased physical well-being and overall QOL assessed by the Functional Assessment of Cancer Therapy-Breast (FACT-B) instrument among 53 postmenopausal breast cancer survivors who had completed cancer-related therapies in Canada. Milne et al. (24) found that, for 58 women diagnosed with stage I–II breast cancer in Australia, combined aerobic and resistance exercise soon after adjuvant therapy improved QOL measured by the FACT-B. However, the randomized controlled trial in Canada showed that neither aerobic nor resistance exercise significantly improved cancer-specific QOL for 242 breast cancer

patients receiving chemotherapy, although the supervised exercise program improved self-esteem and physical fitness (28). Collectively, clinical trials have provided some suggestive evidence that exercise may be an effective intervention to improve QOL for breast cancer patients and survivors.

The association of daily exercise participation with QOL among women with breast cancer has been previously evaluated in several small observational studies. In a 12-month follow-up study of 69 US women who had completed cancer-related treatments for stage 0–II breast cancer, Pinto et al. (10) found that exercise level was related to higher overall QOL and physical functioning as assessed by the Short Form-36. In a recent multiethnic cohort of 729 early-stage breast cancer survivors in the United States, meeting recommended levels of physical activity was associated with better vitality, social functioning, emotional

**Table 4.** Linear Regression Models<sup>a</sup>: Adjusted Mean Differences in Total QOL Score and Scores in 3 QOL Domains Across Exercise Level, Stratified by Total QOL Score 6 Months After Cancer Diagnosis, Shanghai Breast Cancer Survival Study, China, 2002–2008

| QOL 36 Months After Diagnosis                                                      | QOL at 6 Months <Median (n = 914)       |             |                 |             |             | QOL at 6 Months ≥Median (n = 915)       |             |                 |             |             | P for Interaction |
|------------------------------------------------------------------------------------|-----------------------------------------|-------------|-----------------|-------------|-------------|-----------------------------------------|-------------|-----------------|-------------|-------------|-------------------|
|                                                                                    | Exercise-related MET Score <sup>b</sup> |             |                 |             | P for Trend | Exercise-Related MET Score <sup>b</sup> |             |                 |             | P for Trend |                   |
|                                                                                    | <8.3                                    |             | ≥8.3            |             |             | <8.3                                    |             | ≥8.3            |             |             |                   |
|                                                                                    | Mean Difference                         | 95% CI      | Mean Difference | 95% CI      |             | Mean Difference                         | 95% CI      | Mean Difference | 95% CI      |             |                   |
| <i>Exercise-related MET score 6 months after diagnosis<sup>b</sup></i>             |                                         |             |                 |             |             |                                         |             |                 |             |             |                   |
| Total QOL score                                                                    | 1.38                                    | 0.23, 2.53  | 1.46            | 0.36, 2.57  | 0.009       | 0.84                                    | -0.34, 2.03 | 0.87            | -0.27, 2.01 | 0.159       | 0.399             |
| Physical well-being                                                                | 1.14                                    | -0.29, 2.57 | 1.72            | 0.34, 3.09  | 0.014       | 0.39                                    | -1.21, 1.99 | 0.98            | -0.57, 2.52 | 0.205       | 0.715             |
| Psychosocial well-being                                                            | 1.19                                    | -0.42, 2.80 | 1.13            | -0.41, 2.68 | 0.150       | 1.04                                    | -0.48, 2.56 | 0.89            | -0.58, 2.35 | 0.281       | 0.535             |
| Social well-being                                                                  | 0.77                                    | -0.70, 2.25 | 1.53            | 0.12, 2.94  | 0.034       | 1.20                                    | -0.32, 2.72 | 1.67            | 0.21, 3.13  | 0.029       | 0.510             |
| <i>Exercise-related MET score during the 36 months after diagnosis<sup>b</sup></i> |                                         |             |                 |             |             |                                         |             |                 |             |             |                   |
| Total QOL score                                                                    | 1.02                                    | -0.65, 2.69 | 2.41            | 0.83, 3.98  | <0.001      | 0.48                                    | -1.34, 2.31 | 1.10            | -0.62, 2.83 | 0.111       | 0.502             |
| Physical well-being                                                                | 0.57                                    | -1.52, 2.66 | 1.47            | -0.51, 3.44 | 0.074       | -0.22                                   | -2.69, 2.26 | 0.41            | -1.93, 2.75 | 0.444       | 0.655             |
| Psychosocial well-being                                                            | 1.15                                    | -1.18, 3.49 | 2.47            | 0.26, 4.68  | 0.010       | -0.22                                   | -2.57, 2.12 | 0.54            | -1.69, 2.76 | 0.317       | 0.674             |
| Social well-being                                                                  | 0.97                                    | -1.16, 3.10 | 3.36            | 1.35, 5.37  | <0.001      | 0.81                                    | -1.53, 3.16 | 1.89            | -0.33, 4.11 | 0.033       | 0.641             |

Abbreviations: CI, confidence interval; MET, metabolic equivalent task; QOL, quality of life.

<sup>a</sup> Models were adjusted for age at diagnosis, marital status, income, education, comorbidity, menopausal status, menopausal symptoms, waist-to-hip ratio, body mass index, tea consumption, chemotherapy, estrogen receptor/progesterone receptor status, tumor-node metastasis stage, and recurrence/metastasis. Participants in the nonregular exercise group served as the reference.

<sup>b</sup> The cutpoint (8.3 MET-hours/week) was based on the US Department of Health and Human Services national recommendation for recreational physical activity (39).

roles, and global QOL for non-Hispanic, white, and black breast cancer survivors (18). A recent cross-sectional survey in the United States observed that cancer survivors (including breast cancer survivors) who met the physical activity guidelines proposed by the American Cancer Society had a higher QOL than those who did not (15). However, the response rate in this study was relatively low (32.7%). Aside from having small sample sizes (10, 11, 17, 30), several previous studies also suffer from having cross-sectional or retrospective study designs (11, 17, 30), low response rates (e.g., 53.4%) (11, 17), mixed types of cancer (17, 30), or a single QOL measurement at follow-up without considering baseline QOL (10, 12, 13, 18).

Our population-based cohort study with multiple exposure and outcome assessments showed that self-initiated exercise after cancer diagnosis, either a baseline assessment or a cumulative assessment up to 36 months after cancer diagnosis, was positively associated with QOL during the first 36 months after diagnosis, and the association persisted even after adjustment for baseline QOL. Our findings provide the strongest evidence to date that regular exercise may play an important role in improving QOL for breast cancer survivors.

The common physical and psychosocial sequelae of cancer-related treatments and experience include fatigue, sleep disturbance, depression, anxiety, and social isolation (5, 22, 43).

**Table 5.** Mixed Models<sup>a</sup>: Adjusted Mean Differences in Total QOL Score and Scores in 3 QOL Domains Across Exercise Levels, Shanghai Breast Cancer Survival Study, China, 2002–2008

| QOL                     | Exercise-related MET Score <8.3 <sup>b</sup> |            |            | Exercise-related MET Score ≥8.3 <sup>b</sup> |            |            | P Value for Trend of Exercise | Time            |            |         |
|-------------------------|----------------------------------------------|------------|------------|----------------------------------------------|------------|------------|-------------------------------|-----------------|------------|---------|
|                         | Mean Difference                              | 95% CI     | P Value    | Mean Difference                              | 95% CI     | P Value    |                               | Mean Difference | 95% CI     | P Value |
|                         | Total QOL score                              | 0.95       | 0.35, 1.54 | 0.002                                        | 1.79       | 1.25, 2.33 |                               | <0.001          | <0.001     | 0.96    |
| Physical well-being     | 1.19                                         | 0.39, 2.00 | 0.004      | 2.01                                         | 1.28, 2.75 | <0.001     | <0.001                        | 2.63            | 2.15, 3.12 | <0.001  |
| Psychosocial well-being | 1.21                                         | 0.36, 2.06 | 0.005      | 2.12                                         | 1.35, 2.89 | <0.001     | <0.001                        | 0.62            | 0.10, 1.13 | 0.018   |
| Social well-being       | 0.99                                         | 0.25, 1.74 | 0.009      | 2.21                                         | 1.54, 2.88 | <0.001     | <0.001                        | 0.62            | 0.18, 1.06 | 0.006   |

Abbreviations: CI, confidence interval; MET, metabolic equivalent task; QOL, quality of life.

<sup>a</sup> Models were adjusted for age at diagnosis, marital status, income, education, comorbidity, menopausal status, menopausal symptoms, waist-to-hip ratio, body mass index, tea consumption, chemotherapy, estrogen receptor/progesterone receptor status, tumor-node metastasis stage, and recurrence/metastasis. Participants in the nonregular exercise group served as the reference.

<sup>b</sup> The cutpoint (8.3 MET-hours/week) was based on the US Department of Health and Human Services national recommendation for recreational physical activity (39).

Although exercise has been shown to be effective in combating breast-cancer-related fatigue and anxiety and to improve QOL outcomes in both clinical and epidemiologic studies (8, 13, 16, 19, 42, 44), including the current one, there is an important methodological concern with these findings. It is possible that cancer patients whose QOL is better to start with are more likely to participate in exercise, while women with a poorer QOL may avoid exercise—a typical example of reverse causality. To address this concern, we conducted analyses stratified by QOL scores and comorbidity assessed at baseline and by disease stage. We observed an association between regular exercise and QOL among women with a low or high QOL score at baseline, and the association varied little by comorbidity or disease stage. Further adjustment for baseline QOL did not eliminate the exercise and QOL association. These observations argue against reverse causation as the explanation.

Several biopsychosocial mechanisms have been proposed to explain the association of exercise with QOL in cancer patients and survivors. These mechanisms include cardiopulmonary adaptations, endorphins, mastery achievements, positive feedback, distraction, and social interaction (8, 22). Exercise may also influence QOL during cancer treatment by improving coping and adjustment to cancer (e.g., self-efficacy, social interaction) (22). Amelioration of therapy-related symptoms in cancer patients via exercise participation may reduce their impact on capacity for daily living, leisure activities, and interactions with others. Enhanced physical and social activities may improve psychological distress/well-being (e.g., anxiety, depression), thereby improving overall QOL (22).

It should be noted that our study has some limitations. First, we collected information on recreational exercise activities only. Physical activity from other sources, such as daily living and employment, could not be evaluated. Second, we used a generic health-related QOL measurement instead of a disease-specific QOL assessment (e.g., FACT-B). Some issues specific to women with breast cancer may not have been captured. However, to our knowledge, none of the disease-specific QOL assessments, including FACT-B, have been validated in our study population. The generic QOL measure that we used in this study has been validated in a Chinese population, and our previous study showed that this instrument is able to capture differences in QOL between breast cancer patients and the general population (31). Additional limitations include the possibility of residual confounding and the effect of study dropouts over the 36-month postdiagnosis period, although this rate was relatively low in our study (12%). Future research efforts should extend the longitudinal framework used in this study to investigate the long-term effect of regular exercise on QOL, as well as to evaluate the effect of overall physical activity, including physical activity resulting from regular exercise and other sources, on QOL among breast cancer survivors.

The number of breast cancer patients and survivors in the United States and many other countries in the world continues to increase. It has been well documented that breast cancer and cancer-related treatments negatively affect QOL, which in turn results in a poor prognosis for breast cancer patients. Our finding provides strong evidence that regular

participation in moderate exercise improves the overall QOL and the physical, psychological, and social well-being of breast cancer survivors. Thus, programs aiming to promote regular exercise participation and exercise levels after breast cancer diagnosis should be developed and evaluated.

## ACKNOWLEDGMENTS

Author affiliations: Department of Medicine, Division of Epidemiology, Vanderbilt Epidemiology Center and Vanderbilt-Ingram Cancer Center, Vanderbilt University Medical Center, Nashville, Tennessee (Xiaoli Chen, Wei Zheng, Zhi Chen, Xiao Ou Shu); and Shanghai Institute of Preventive Medicine, Shanghai, China (Ying Zheng, Kai Gu, Wei Lu).

This study was supported by the Department of Defense Breast Cancer Research Program (grant DAMD 17-02-1-0607) and the National Cancer Institute (grant R01 CA118229). The content of the information does not necessarily reflect the position or the policy of the US Government, and no official endorsement should be inferred.

The authors thank Dr. Fan Jin for her support in study implementation and the staff members of the Shanghai Breast Cancer Survival Study for making this study possible. The authors also thank Drs. Hui Cai and Wanqing Wen for their assistance with statistical analysis and Bethanie Hull for her assistance in preparing the manuscript.

Conflict of interest: none declared.

## REFERENCES

1. Parkin DM, Fernández LM. Use of statistics to assess the global burden of breast cancer. *Breast J*. 2006;12(suppl 1):S70–S80.
2. American Cancer Society. *Breast Cancer Facts & Figures, 2005–2006*. Atlanta, GA: American Cancer Society; 2005.
3. Jemal A, Siegel R, Ward E, et al. Cancer statistics, 2008. *CA Cancer J Clin*. 2008;58(2):71–96.
4. Ries L, Harkins D, Krapcho M. *Surveillance, Epidemiology, and End Results (SEER) Cancer Statistics Review, 1975–2003*. Bethesda, MD: National Cancer Institute; 2006.
5. Shapiro CL, Recht A. Side effects of adjuvant treatment of breast cancer. *N Engl J Med*. 2001;344(26):1997–2008.
6. Bower JE, Ganz PA, Desmond KA, et al. Fatigue in breast cancer survivors: occurrence, correlates, and impact on quality of life. *J Clin Oncol*. 2000;18(4):743–753.
7. Montazeri A. Health-related quality of life in breast cancer patients: a bibliographic review of the literature from 1974 to 2007. *J Exp Clin Cancer Res*. 2008;27:32.
8. Courneya KS, Mackey JR, Bell GJ, et al. Randomized controlled trial of exercise training in postmenopausal breast cancer survivors: cardiopulmonary and quality of life outcomes. *J Clin Oncol*. 2003;21(9):1660–1668.
9. Valenti M, Porzio G, Aielli F, et al. Physical exercise and quality of life in breast cancer survivors. *Int J Med Sci*. 2008;5(1):24–28.
10. Pinto BM, Trunzo JJ, Reiss P, et al. Exercise participation after diagnosis of breast cancer: trends and effects on mood and quality of life. *Psychooncology*. 2002;11(5):389–400.



11. Milne HM, Gordon S, Guilfoyle A, et al. Association between physical activity and quality of life among Western Australian breast cancer survivors. *Psychooncology*. 2007;16(12):1059–1068.
12. Kendall AR, Mahue-Giangreco M, Carpenter CL, et al. Influence of exercise activity on quality of life in long-term breast cancer survivors. *Qual Life Res*. 2005;14(2):361–371.
13. Alfano CM, Smith AW, Irwin ML, et al. Physical activity, long-term symptoms, and physical health-related quality of life among breast cancer survivors: a prospective analysis. *J Cancer Surviv*. 2007;1(2):116–128.
14. Young-McCaughan S, Sexton DL. A retrospective investigation of the relationship between aerobic exercise and quality of life in women with breast cancer. *Oncol Nurs Forum*. 1991; 18(4):751–757.
15. Blanchard CM, Courneya KS, Stein K. Cancer survivors' adherence to lifestyle behavior recommendations and associations with health-related quality of life: results from the American Cancer Society's SCS-II. *J Clin Oncol*. 2008;26(13): 2198–2204.
16. Courneya KS, Friedenreich CM. Physical exercise and quality of life following cancer diagnosis: a literature review. *Ann Behav Med*. 1999;21(2):171–179.
17. Blanchard CM, Baker F, Denniston MM, et al. Is absolute amount or change in exercise more associated with quality of life in adult cancer survivors? *Prev Med*. 2003;37(5):389–395.
18. Smith AW, Alfano CM, Reeve BB, et al. Race/ethnicity, physical activity, and quality of life in breast cancer survivors. *Cancer Epidemiol Biomarkers Prev*. 2009;18(2):656–663.
19. McNeely ML, Campbell KL, Rowe BH, et al. Effects of exercise on breast cancer patients and survivors: a systematic review and meta-analysis. *CMAJ*. 2006;175(1):34–41.
20. Courneya KS, Friedenreich CM, Sela RA, et al. The group psychotherapy and home-based physical exercise (group-hope) trial in cancer survivors: physical fitness and quality of life outcomes. *Psychooncology*. 2003;12(4):357–374.
21. Segal R, Evans W, Johnson D, et al. Structured exercise improves physical functioning in women with stages I and II breast cancer: results of a randomized controlled trial. *J Clin Oncol*. 2001;19(3):657–665.
22. Courneya KS. Exercise interventions during cancer treatment: biopsychosocial outcomes. *Exerc Sport Sci Rev*. 2001;29(2): 60–64.
23. Mutrie N, Campbell AM, Whyte F, et al. Benefits of supervised group exercise programme for women being treated for early stage breast cancer: pragmatic randomised controlled trial. *BMJ*. 2007;334(7592):517.
24. Milne HM, Wallman KE, Gordon S, et al. Effects of a combined aerobic and resistance exercise program in breast cancer survivors: a randomized controlled trial. *Breast Cancer Res Treat*. 2008;108(2):279–288.
25. Hwang JH, Chang HJ, Shim YH, et al. Effects of supervised exercise therapy in patients receiving radiotherapy for breast cancer. *Yonsei Med J*. 2008;49(3):443–450.
26. Bicego D, Brown K, Ruddick M, et al. Effects of exercise on quality of life in women living with breast cancer: a systematic review. *Breast J*. 2009;15(1):45–51.
27. De Backer IC, Vreugdenhil G, Nijziel MR, et al. Long-term follow-up after cancer rehabilitation using high-intensity resistance training: persistent improvement of physical performance and quality of life. *Br J Cancer*. 2008;99(1): 30–36.
28. Courneya KS, Segal RJ, Mackey JR, et al. Effects of aerobic and resistance exercise in breast cancer patients receiving adjuvant chemotherapy: a multicenter randomized controlled trial. *J Clin Oncol*. 2007;25(28):4396–4404.
29. Cadmus LA, Salovey P, Yu H, et al. Exercise and quality of life during and after treatment for breast cancer: results of two randomized controlled trials. *Psychooncology*. 2009;18(4): 343–352.
30. Humpel N, Iverson DC. Depression and quality of life in cancer survivors: is there a relationship with physical activity [electronic article]? *Int J Behav Nutr Phys Act*. 2007;4:65.
31. Lu W, Cui Y, Zheng Y, et al. Impact of newly diagnosed breast cancer on quality of life among Chinese women. *Breast Cancer Res Treat*. 2007;102(2):201–210.
32. Lu W, Cui Y, Chen X, et al. Changes in quality of life among breast cancer patients three years post-diagnosis. *Breast Cancer Res Treat*. 2009;114(2):357–369.
33. Grunau GL, Sheps S, Goldner EM, et al. Specific comorbidity risk adjustment was a better predictor of 5-year acute myocardial infarction mortality than general methods. *J Clin Epidemiol*. 2006;59(3):274–280.
34. World Health Organization. *International Classification of Diseases, Ninth Revision, Clinical Modification (ICD-9-CM)*. Geneva, Switzerland: World Health Organization; 1998.
35. Ainsworth BE, Haskell WL, Leon AS, et al. Compendium of physical activities: classification of energy costs of human physical activities. *Med Sci Sports Exerc*. 1993;25(1):71–80.
36. Matthews CE, Shu XO, Yang G, et al. Reproducibility and validity of the Shanghai Women's Health Study physical activity questionnaire. *Am J Epidemiol*. 2003;158(11):1114–1122.
37. Li L, Wei H, Young D. The development of the general quality of life inventory. *China Ment Health J*. 1995;9:227–231.
38. Li L, Young D, Wei H, et al. The relationship between objective life status and subjective life satisfaction with quality of life. *Behav Med*. 1998;23(4):149–159.
39. US Department of Health and Human Services. *2008 Physical Activity Guidelines for Americans*. (<http://www.health.gov/PAGuidelines/guidelines/>).
40. Vallance JK, Courneya KS, Plotnikoff RC, et al. Randomized controlled trial of the effects of print materials and step pedometers on physical activity and quality of life in breast cancer survivors. *J Clin Oncol*. 2007;25(17):2352–2359.
41. Culos-Reed SN, Carlson LE, Daroux LM, et al. A pilot study of yoga for breast cancer survivors: physical and psychological benefits. *Psychooncology*. 2006;15(10):891–897.
42. Kolden GG, Strauman TJ, Ward A, et al. A pilot study of group exercise training (GET) for women with primary breast cancer: feasibility and health benefits. *Psychooncology*. 2002; 11(5):447–456.
43. Jacobsen PB, Donovan KA, Small BJ, et al. Fatigue after treatment for early stage breast cancer: a controlled comparison. *Cancer*. 2007;110(8):1851–1859.
44. Blanchard CM, Courneya KS, Laing D. Effects of acute exercise on state anxiety in breast cancer survivors. *Oncol Nurs Forum*. 2001;28(10):1617–1621.
